1                                    Catching a liar through facial expression of fear

2  
3                    Xunbing Shen<sup>1</sup>   Gaojie Fan<sup>2</sup>   Caoyuan Niu<sup>1</sup>   Zhencai Chen<sup>1</sup>

4                    <sup>1</sup>Jiangxi University of Traditional Chinese Medicine, Nanchang, 330004

5                    <sup>2</sup> Louisiana State University, Baton Rouge, 70803

6  
7  
8    Abstract

9    The leakage theory in the field of deception detection predicted that liars could  
10   not repress the leaked felt emotions (e.g., the fear or delight); and people who  
11   were lying would feel fear (to be discovered), especially under the high-stake  
12   situations. Therefore, we assumed that the aim of revealing deceits could be  
13   reached via analyzing the facial expression of fear. Detecting and analyzing the  
14   subtle leaked fear facial expressions is a challenging task for laypeople. It is,  
15   however, a relatively easy job for computer vision and machine learning. To test  
16   the hypothesis, we analyzed video clips from a game show “The moment of truth”  
17   by using OpenFace (for outputting the Action Units of fear and face landmarks)  
18   and WEKA (for classifying the video clips in which the players was lying or  
19   telling the truth). The results showed that some algorithms could achieve an  
20   accuracy of greater than 80% merely using AUs of fear. Besides, the total  
21   durations of AU 20 of fear were found to be shorter under the lying condition  
22   than under the truth-telling condition. Further analysis found the cause why  
23   durations of fear were shorter was that the duration from peak to offset of AU20  
24   under the lying condition was less than that under the truth-telling condition. The  
25   results also showed that the facial movements around the eyes were more  
26   asymmetrical while people telling lies. All the results suggested that there do exist  
27   facial clues to deception, and fear could be a cue for distinguishing liars from  
28   truth-tellers.

29  
30  
31    Keywords: Deception detection, leakage theory, fear, machine learning,  
32    asymmetry

33

## 34 **1. Introduction**

35 Are there any observable behaviors or cues which can differentiate lying from  
36 being honest? For this question, almost all researchers in the field of deception  
37 detection think there is no “Pinocchio’s nose”(DePaulo et al., 2003). Nevertheless,  
38 Many researchers try hard to find the cues to deception (Denault et al., 2020;  
39 Levine, 2018). Specifically, from the perspective of leakage theory (Ekman, 2003;  
40 Ekman & Friesen, 1969; Matsumoto & Hwang, 2020; Porter et al., 2011; Porter  
41 et al., 2012; Su & Levine, 2016), observable emotional facial expressions  
42 (microexpressions and macroexpressions) can, to some degree, determine who is  
43 lying and who is telling the truth (It’s a probability problem, see Levine, 2018,  
44 2019).

45 The “leakage theory” asserts that high-stake lies (the rewards come with  
46 serious consequences or there can be severe punishments) can result in ‘leakage’  
47 of the deception into physiological changes or behaviors (especially  
48 microexpressions). In turn, the presence of leakage suggests the high probability  
49 of existence of deception(Ten Brinke, MacDonald, et al., 2012; ten Brinke &  
50 Porter, 2012; Ten Brinke, Porter, et al., 2012). However, there is debate about  
51 whether or not the emotional facial expressions can differentiate lying from truth-  
52 telling. Some researchers (Matsumoto & Hwang, 2018; ten Brinke & Porter, 2012;  
53 Ten Brinke, Porter, et al., 2012) thought the emotional facial microexpression  
54 could be a cue to lies and found some evidence supporting the claim. Nevertheless,  
55 Burgoon (2018) regarded that the microexpressions were not the best way to  
56 catch a liar. Furthermore, Vrij et al. (2019) even categorized microexpression into  
57 pseudoscience.

58 There indeed are some behavioral cues that can, to some degree, differentiate  
59 lying from truth-telling(Vrij et al., 2006; Vrij et al., 2000). Especially, pupil  
60 dilation and pitch are closely related to lying (Levine, 2018, 2019). Emotional  
61 facial expressions can also be behavioral cues of this kind. Most of the deception  
62 researchers agree that lying does involve processes or factors such as arousal and  
63 felt emotion (Zuckerman et al., 1981). Meanwhile, there are involuntary aspects  
64 of emotional expression. As noted by Darwin, some actions of facial muscles are  
65 the most difficult to control voluntarily and are the hardest to be inhibited (the so-  
66 called Inhibition Hypothesis, see also (Ekman, 2003). When a strong felt genuine

67 emotion presents, the actions of the expressions of the felt emotion cannot be  
68 suppressed (Baker et al., 2016). Hurley and Frank (2011) provided evidence for  
69 Darwin's hypothesis and found that deceivers could not control some elements  
70 of their facial expression, such as eyebrow movements. The liar would feel fear,  
71 duping delight, disgust, or appear tense while lying, and would attempt to  
72 suppress these emotions by neutralizing, masking, or simulating (Porter & Ten  
73 Brinke, 2008). However, the liars cannot inhibit them completely and the felt  
74 emotion will be "leaked" out in the form of microexpressions, especially under  
75 high-stake situations (Ekman & Friesen, 1969).

76 Some recent research substantiated the claim of emotional leakage (Porter et  
77 al., 2011; Porter et al., 2012). When liars camouflage with an unfelt emotional  
78 facial expression or neutralize the felt emotion, at least one inconsistent  
79 expression would leak and present transiently (Porter and Ten Brinke (2008). ten  
80 Brinke and Porter (2012) showed that liars would present unsuccessful emotional  
81 masking and certain leaked facial expressions (e.g., "the presence of a smirk").  
82 In addition, they found that false remorse was associated with (involuntary and  
83 inconsistent) facial expressions of happiness and disgust (Ten Brinke,  
84 MacDonald, et al., 2012).

85 There is some evidence that supports the claim that leaked emotions can  
86 differentiate telling lies from telling the truth. Wright Whelan et al. (2014) used  
87 cues that included emotional ones to identify high-stake deception and got an  
88 accuracy of 78%. Meanwhile, Wright Whelan et al. (2015) found non-police and  
89 police observers could reach an accuracy of 68% and 72%, respectively. Using  
90 methods of machine learning, Su and Levine (2016) found that emotional facial  
91 expressions (including microexpressions) could be effective cues while the  
92 participants judging high-stake lies, in which the accuracy was much higher than  
93 those reported in previous studies (e.g., Bond Jr & DePaulo, 2006). They found  
94 Action Units (the contraction or relaxation of one or more muscles, see Ekman  
95 & Friesen, 1976) of AU1, AU2, AU4, AU12, AU15, and AU45 (blink) could be  
96 potentially effective indicators for distinguishing liars from truth-tellers in high-  
97 stakes situations. Bartlett et al. (2014) showed that machine vision could  
98 differentiate deceptive pain facial signals from genuine pain facial signals (at 85%  
99 accuracy). Matsumoto and Hwang (2018) found that facial expressions of

100 negative emotions that occurred for less than 0.40 and 0.50 seconds could  
101 differentiate truth-tellers and liars.

102 The leakage theory of deception predicted that liars should fear of being  
103 discovered, and that the fear emotions resulted from deception (especially high-  
104 stake one) might leak the deception (Levine, 2019). Meanwhile, it is presumed  
105 that if the fear associated with deception is leaked, then the duration of the leaked  
106 fear will be shorter due to the nature of leaking (which will be showed as fleeting  
107 fear micro-expressions) and repressing. Someone may argue that the fear emotion  
108 may also appear while telling the truth. It can be true. Nevertheless, for a truth-  
109 teller, the fear of being wrongly treated as a liar would be less leaking, since a  
110 truth-teller doesn't need to try hard to repress the fear as liars do (the degree of  
111 repressing will be different between liars and truth-tellers). On average, the  
112 duration of fear (or AUs of fear) in lying situations would be shorter than that in  
113 truth-telling situations due to the harder repressing. Meanwhile, researchers  
114 (Ekman et al., 1981; Frank et al., 1993) found that the genuine smile has different  
115 dynamic features, such as a smoother onset and more symmetry(Ekman et al.,  
116 1981), when compared with a deliberate smile. Accordingly, the leaked  
117 emotional facial expressions of fear while lying and the less leaked ones when  
118 telling a truth may have different dynamic qualities.

119 Stakes may play a vital role while using an emotional facial expression as a  
120 cue to deception. Participants experience fewer emotions or less cognitive load  
121 in laboratory research (Buckley, 2012). Almost all laboratory experiments are  
122 typical of low stakes and are not sufficiently motivating to trigger emotions  
123 giving rise to leakage (in the form of microexpressions). Consequently, liars in  
124 laboratory experiments are not as nervous as in real-life high-stake situations,  
125 with no or little emotion leakage. As noted by Vrij (2004), some laboratory-based  
126 studies in which the stakes were manipulated had found that high-stakes lies were  
127 easier to detect than low-stakes lies. Frank and Ekman (1997) stated that "*the*  
128 *presence of high stakes is central to liars feeling strong emotion when lying*".  
129 Therefore, lying under the higher stakes condition would be more detectable  
130 while using cue of emotional facial expressions, and leaked emotional facial  
131 expressions may mostly occur in a high-stakes context.

132 Hartwig and colleagues(2014) claimed that the emotional leakage theory could  
133 not be supported and the context of the high stake would influence both liars and  
134 truth-tellers, as liars and truth-tellers might experience similar psychological  
135 processes. In other words, a truth-teller would also produce inconsistent  
136 emotional expressions like fear. To some degree, this is the case (ten Brinke &  
137 Porter, 2012). Even though the high-stake situations increase pressure on both  
138 liar and truth-tellers, it can be assumed that the degree of increment would be  
139 different; and the liars would feel much higher pressure. In addition, to fabricate  
140 a lie, in general, liars have to think more in their minds and would have higher  
141 emotional arousal than truth-tellers. Consequently, for liars, the frequency or  
142 probability of leaking an inconsistent emotional expression (say, fear) would be  
143 higher and there would be more emotional signs presented for liars. In theory, the  
144 higher the stakes are, the more likely cues associated with deception (e.g., fear)  
145 are leaked, and the easier the liars could be identified.

146 Based on the leakage theory and previous evidence, we hypothesize that 1)  
147 emotional facial expressions of fear (fear of being caught) can differentiate lying  
148 from truth-telling at high-stake situations; 2) The duration of AUs of fear in lying  
149 will be shorter than in truth-telling; 3) The symmetry of facial movements will be  
150 different, as facial movements in lying situations will be more asymmetrical (due  
151 to the nature of repressing and leaking).

152 To test these hypotheses, we used videos of high-stake lies as experimental  
153 material, and a software of computer vision to automatically analyze the signals  
154 of emotional facial expressions. Compared to the slightly-better-than-chance  
155 accuracy obtained by human observers, computer vision can reach a relatively  
156 high accuracy when distinguishing deception from truth-telling (Bartlett et al.,  
157 2014). Given that the subtle differences of emotional facial expressions may not  
158 be detected by naive human observers, the methods of computer vision may  
159 capture the different features between lying and truth-telling situations which  
160 cannot be perceived by a human lie detector.

## 161 **2. Results**

### 162 2.1. AUs of fear can differentiate liars from truth-tellers

#### 163 2.1.1 Machine learning classification results.

164 The whole dataset was split into two subsets, i.e., data collected from 12  
165 participants were used for training, and the data collected from remaining 4  
166 participants were used for testing. Three classifiers were trained on dataset of 12  
167 participants to discriminate liars from truth-tellers using feature vectors of AUs  
168 of fear (i.e., AU01, AU02, AU04, AU05, AU07, AU 20, and AU26, for details  
169 see <https://imotions.com/blog/facial-action-coding-system/> ). All of the three  
170 classifiers, Random Forest, K-nearest neighbours (LBK), and Bagging, were  
171 trained in WEKA via a 10-fold cross-validation procedure. To highlight the  
172 relative importance of AUs of fear in classification accuracy, we eliminated all  
173 other indicators used by Beh and Goh (2019). Table 1 shows the performance of  
174 machine learning analysis which conducted on dataset of 12 participants and  
175 tested with the data of remaining 4 participants.

176 Table 1. Machine learning performance of the Random Forest, LBK, and Bagging.

| <b>Classifier</b> | <b>Accuracy</b> | <b>TP<br/>Rate</b> | <b>FP<br/>Rate</b> | <b>Precision</b> | <b>Recall</b> | <b>F-<br/>Measure</b> | <b>PRC<br/>Area</b> | <b>Kappa</b> |
|-------------------|-----------------|--------------------|--------------------|------------------|---------------|-----------------------|---------------------|--------------|
| Random<br>Forest  | 86.9033%        | 0.869              | 0.813              | 0.818            | 0.869         | 0.833                 | 0.811               | 0.0829       |
| LBK               | 85.1068%        | 0.851              | 0.804              | 0.805            | 0.851         | 0.824                 | 0.799               | 0.0624       |
| Bagging           | 86.1482%        | 0.861              | 0.852              | 0.794            | 0.861         | 0.821                 | 0.827               | 0.0141       |

177  
178 Table 1 reports the percentage of accuracy obtained on the testing data set. In  
179 addition to accuracies, the table reports the weighted average of True Positive  
180 Rate (TP Rate, instances correctly classified as a given class), False Positive Rate  
181 (FP Rate, instances falsely classified as a given class), Precision value (proportion  
182 of instances that are truly of a class divided by the total instances classified as  
183 that class), Recall value (proportion of instances classified as a given class  
184 divided by the actual total in that class), F-Measure (A combined measure for  
185 precision and recall), Precision-Recall Curve (PRC) Area value (A model  
186 performance metrics based on precision and recall) and Kappa (which measures  
187 the agreement between predicted and observed categorizations). The details of  
188 these statistics can be seen in Witten et al. (2016).

189

190 2.1.2 the differences of AUs of fear between truth-telling and lying video clips

191 We took the averages of AUs related to fear for each individual to explore how  
192 they differ in lying versus truth-telling. The first analysis was carried out by  
193 examining the statistical differences of AUs of fear between truth-telling and  
194 lying video clips through paired *t*-test. To avoid the multiple-testing problem, we  
195 applied Bonferroni correction and set *p*-value to 0.007. We also calculated  
196 Cohen's *d* to measure effect size. The results are presented in Table 2. When  
197 Bootstrapping was used, the *p*-value of comparing AU20 in the two groups  
198 was .006 (for AU05 the corresponding *p*-value is .008). This analysis revealed  
199 that liars and truth-teller have differences in the facial expressions of fear.

200

201 Table 2. the results of paired *t*-test for comparing the means of values of AUs of fear between  
202 truth-telling and lying video clips

| Feature | Deception<br>(Mean) | Truth<br>(Mean) | 95% CI of mean<br>difference |        | <i>t</i> -value | <i>p</i> -value | Effect<br>size* |
|---------|---------------------|-----------------|------------------------------|--------|-----------------|-----------------|-----------------|
| AU01    | .2544               | .2735           | -.1562                       | .1180  | -.297           | .771            | .074            |
| AU02    | .1308               | .1759           | -.1099                       | .0196  | -1.487          | .158            | .371            |
| AU04    | .1686               | .1554           | -.0709                       | .0972  | .333            | .743            | .084            |
| AU05    | .0341               | .0639           | -.0505                       | -.0090 | -3.060          | .008            | .766            |
| AU07    | .7929               | .8517           | -.3581                       | .2405  | -.419           | .681            | .105            |
| AU20    | .0838               | .1427           | -.0978                       | -.0200 | -3.226          | <b>.006</b>     | .807            |
| AU26    | .3969               | .4721           | -.1825                       | .0321  | -1.493          | .156            | .374            |

203

204 \*Note: the effect sizes were calculated by using the calculator from the website:  
205 [https://memory.psych.mun.ca/models/stats/effect\\_size.shtml](https://memory.psych.mun.ca/models/stats/effect_size.shtml).

206

207

208 2.2 There were more transient durations of AU of fear while lying.

209 Ekman (2003) reported that many people could not inhibit the activity of the  
210 AU20 (Stretching the lips horizontally) while examining videotapes of people  
211 lying and telling the truth. Our results reported in section 2.1.2 also found  
212 significant differences between truth-telling and lying video clips in values of AU  
213 20. Therefore, differences in the durations from onset to peak, from peak to offset,  
214 and total durations of AU 20 between truth-telling video clips (in which the  
215 quantity of AU20 is 675) and lying video clips (in which the quantity of AU20 is  
216 47) were analyzed with independent samples *t*-test, using bootstrapping with  
217 1000 iterations. The results showed that there were significant differences in the  
218 total duration and duration from peak to offset between truth-telling video clips  
219 and lying video clips (20.77 vs. 15.21 frames,  $p = .033$ , effect size = 0.276; 11.35  
220 vs. 6.98 frames,  $p = .04$ , effect size = 0.347). The durations of AU20 in lying video  
221 clips were nearly 4 frames (133 ms) shorter than those in truth-telling video clips  
222 on average, because the facial movements (herein the AU20) disappeared more  
223 quickly in the lying condition. Figure 1 shows the distribution of total frames,  
224 frames from onset to apex, and frames from apex to offset of AU20. The median  
225 is 12 in the truth-telling video clips and 8 in the lying video clips. For lying video  
226 clips, the 95% confidence interval is 10.32 to 20.11 frames for the mean of total  
227 duration, and 19.03 to 22.52 frames for truth-telling video clips. There were 16  
228 (out of 47) AU20s which durations were less than or equal to 6 frames (200 ms)  
229 in the lying video clips, while there were 145 (out of 675) in the truth-telling  
230 video clips. There were 32 AU20s which durations were less than or equal to 15  
231 frames (500 ms) in the lying video clips, and the corresponding number is 407 in  
232 the truth-telling video clips.



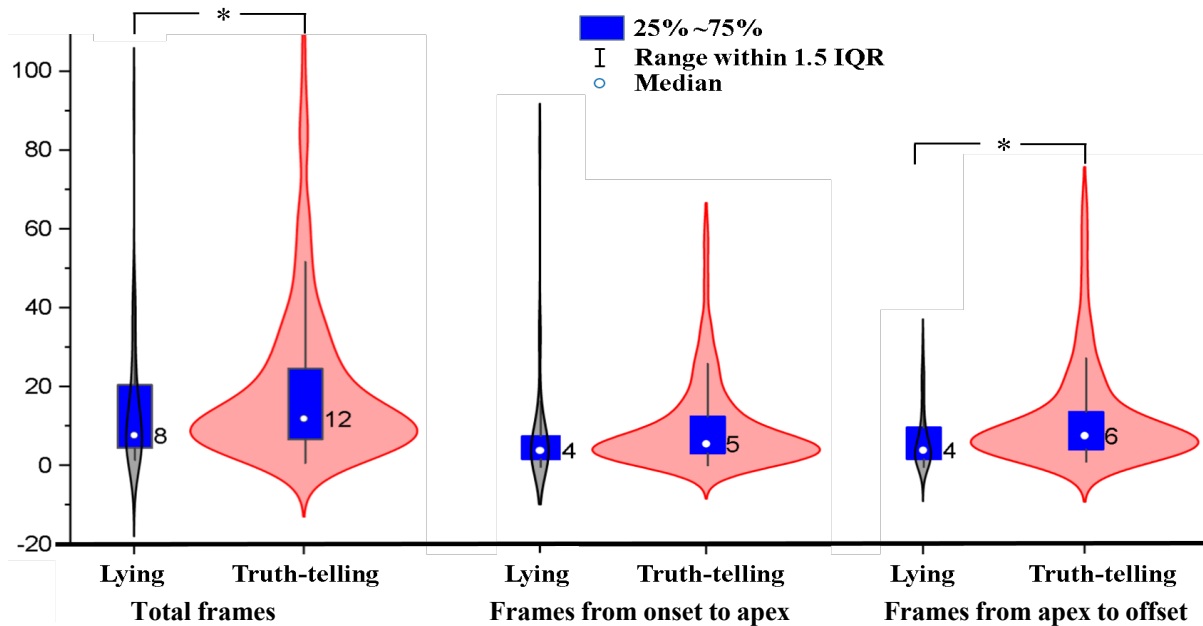

233

234

235

236

Figure 1. Violin plot for frames of AU20 in truth-telling and lying video clips. IQR = Inter-Quartile Range. \*: statistically significant ( $p < .05$ ) differences between lying and truth-telling.

237

238

### 2.3 Asymmetries of the facial movements were more salient in lying than truth-telling.

239

240

241

242

243

244

245

246

Ekman et al. (1981) manually analyzed the facial asymmetry by using the Facial Action Coding System (FACS). This artificial approach is time-consuming, and subjective. In the current study, we proposed a method that used coherence (a measure of the correlation between two signals/variables) to measure the asymmetry. The more symmetrical the facial movements of the left and right face, the higher the coefficient of correlation between them. Consequently, the value of coherence (ranges from 0 to 1) can be a measurement of asymmetry or symmetry.

247

248

249

250

251

252

We calculated the distances of ld1 and rd1 (Beh & Goh, 2019) in each frame, which corresponded to movements of left and right eyebrows. Next, we used the MATLAB function of Wcoherence (wavelet coherence) to measure the correlation between ld1 and rd1 in each video. If the movements were symmetrical, e.g., they have the exact same onset time, reach the apex on the same time, and disappear at the same time, the coherence between ld1 and rd1

253 should be 1, and any asynchrony would result in a value of coherence of less than  
254 1, and the value of the coherence would be even smaller with the more asymmetry  
255 existed. Figure 2 shows the wavelet coherence in truth-telling and lying video  
256 clips.

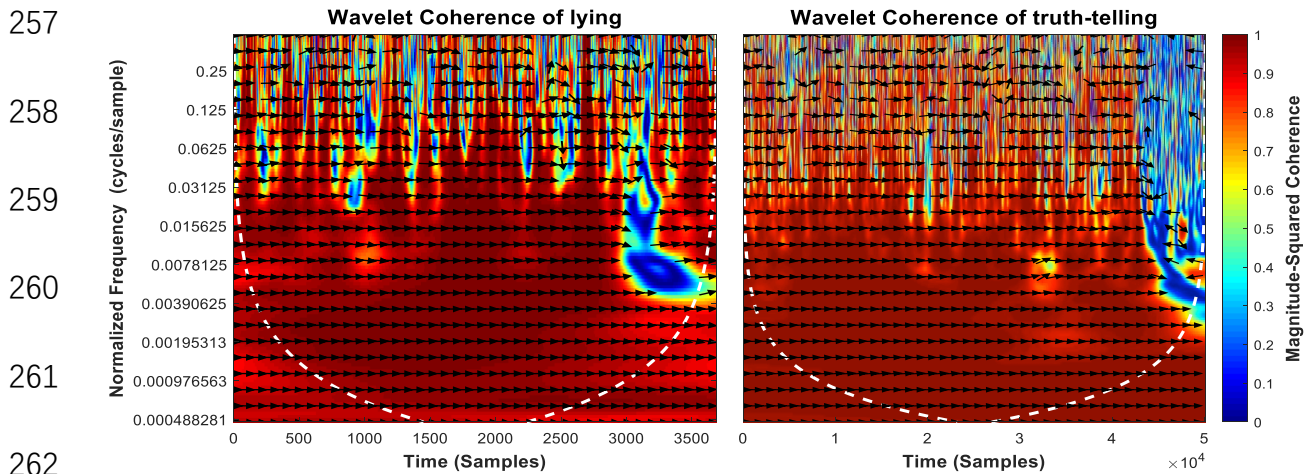

263 Figure 2. Squared wavelet coherence between the ld1 and rd1 in lying (left panel) and truth-  
264 telling (right panel) situations. The relative phase relationship is shown as arrows (A rightward  
265 arrow indicates 0 lag; a bottom-right arrow indicates a small lead of ld1; a leftward arrow  
266 indicates ld1 and ld2 is anti-correlated.).

267

268 The output values of the function of Wcohenrence for each player (i.e., the  
269 average of coherence between ld1 and rd1) were entered into the Permutation  
270 Test (see the following link for details: <https://github.com/lrkrol/permutationTest>)  
271 to compare the asymmetry differences between the lying and truth-telling  
272 situation. Permutation tests provide elegant ways to control for the overall Type  
273 I error and are distribution free. The results showed that there were significant  
274 differences between lying and truth-telling situations (the means of coherence are  
275 0.7083 and 0.8096,  $p = .003$ , effect size = 1.3144).

276

### 277 3. Discussion

278 Is there any effective cue to deception? It is widely accepted that cues to  
279 deception, even exist, are weak. According to leakage theory, the leaked  
280 emotional facial expressions, especially the leaked fear, can differentiate lying  
281 from truth-telling. The current study confirmed the prediction of leakage theory.

282 The results of machine learning indicated that emotional facial expressions of fear  
283 can differentiate lying from truth-telling in the high-stake game show; the paired  
284 comparisons showed significant differences between lying and truth-telling in  
285 values of AU 20 of fear (AU5 is marginally significant). The results also  
286 substantiated the other two hypotheses. The duration of AUs of fear in lying was  
287 shorter than in truth-telling. The results showed that the total duration and the  
288 duration from peak to offset of AU 20 of fear were shorter while lying than while  
289 telling truth. The third hypothesis predicted that the symmetry of facial  
290 movements will be different, and the findings indicated that the facial movements  
291 were more asymmetrical in lying situations than in truth-telling situations.

292 In the current study, the method of machine learning can classify deception and  
293 honesty, which made up the shortcomings of human coding and were managed  
294 to find out the subtle differences between lying and truth-telling. Meanwhile, an  
295 objective measure of asymmetry was proposed. To our best knowledge, this is  
296 the first objective method to measure the asymmetry of facial movements in  
297 deception detection. By using these methods, we did find there were differences  
298 between lying and truth-telling, which is the prerequisite for looking for clues of  
299 deception (if there is no difference between lying and truth-telling, then there will  
300 be no cues to deception).

301 The leaked behaviors can be cues to deception, but they are not deception per  
302 se. They are, however, closely linked with deception. As shown in the results,  
303 truth-tellers also can experience fear. However, for honest people, the dynamics  
304 of experienced fear were very different when compared with liars. Thus, the fear  
305 emotion could be considered as a “hot spot” of deceit. Looking for the nonverbal  
306 “hot spots” of individuals is very suitable for the scenario in which rapid  
307 evaluation is required. Some other approaches of deception detection, for  
308 example, brain activities, cannot provide real-time results (Vrij & Fisher, 2020).  
309 The results suggested that the “hot spots” - emotional expressions of fear - could  
310 distinguish between truthful and deceptive messages with a reasonable level of  
311 accuracy. Using machine learning, we can get a relatively higher accuracy (above  
312 80%) compared to the average accuracy achieved by people (54%, see Bond Jr  
313 and DePaulo (2006). Apart from accuracy, there was a large effect size for the  
314 AU of fear (AU 20) while differentiating lies from truth.

315 High-stake lies were used in some previous research. For example, Vrij and  
316 Mann (2001) used the videotaped press conferences of people who were asking  
317 for help in finding their relatives and some people were found guilty. For those  
318 materials, neither Artificial Intelligence nor a human can be sure of a veracity  
319 status or ‘ground truth’ without substantial evidence. Our database consists of  
320 high-stakes deception videos from a real game show, in which we know the  
321 veracity of the statements (there are some limits in the current game show due to  
322 the unreliable polygraph test, which can be fixed in future work using the certain  
323 ground-truth game shows such as Golden Balls, see Van den Assem et al., 2012).  
324 This kind of experimental materials has both a relatively higher ecological  
325 validity and internal validity.

326 Were the facial expressions in lying video clips all microexpressions (facial  
327 expressions last for from 1/25 to 1/5 of a second)? The current results of total  
328 duration showed that the average of frames of AU20 was 20.77 in truth-telling  
329 video clips and was 15.21 in lying ones, corresponding to 692ms and 507ms; the  
330 95% confidence intervals of total duration were from 19.03 to 22.52 frames  
331 (634ms ~ 751ms) while telling truth and were from 10.32 to 20.11 frames (344ms  
332 ~ 670ms) while lying. In the current study, the mean was affected by extreme  
333 values or outliers (see Figure 1). Thus, we used the median, which could be a  
334 more appropriate statistic for the duration. The median of duration in the truth-  
335 telling video clips was 12 (400ms) and in the lying video clips was 8 (267ms).  
336 Although the duration of (partial) fear were shorter in lying video clips than in  
337 truth-telling video clips, most of the durations in lying did not fit into the limits  
338 of traditional durations of microexpressions, i.e., less than 200ms (see Shen et al.  
339 (2012). There were nearly 1/3 AU20s for which durations were less than or equal  
340 to 6 frames (200 ms) in the lying video clips, and only 1/5 of them in the truth-  
341 telling video clips were less than or equal to 6 frames. By using 500ms as the  
342 boundary between microexpressions and macroexpressions (see Matsumoto &  
343 Hwang, 2018), there were almost 2/3 of the facial expressions that could be  
344 named after microexpressions. The results suggested that the leaked emotional  
345 facial expressions in real life were much longer (the duration of apex of leaked  
346 emotional facial expressions would be less than 200ms). No matter what the  
347 duration is, or whether the facial expression is a microexpression or not, the

348 durations of facial expressions were significantly shorter in the lying video clips  
349 than in the truth-telling video clips.

350 Taken together, our findings suggested that deception is detectable by using  
351 emotional facial expressions of fear in high-stake situations. Lying in the high-  
352 stake situations will leak facial expressions of fear. The durations of fear were  
353 significantly different between lying and truth-telling conditions. Besides, the  
354 facial movements will be more asymmetrical in the scenario of lying than in the  
355 scenario of telling truth.

356 Our findings prompted that attending to the dynamic features of AU20 (such  
357 as symmetry and duration) can improve people's ability to differentiate liars from  
358 truth-teller. Besides, the machine learning approach may be employed to detect  
359 other real-world deceptive actions in the field of deception detection, especially  
360 those high-stake situations in which strong emotions will be generated, associated  
361 with attempts to neutral, mask, and fake such emotions (similar work is done in  
362 the project of iBorderCtrl, see Crampton, 2019).

363 Pupil dilation and pitch of speech are found to be significantly related to  
364 deception by some studies of meta-analysis (Bella M. DePaulo et al., 2003;  
365 Levine, 2019; Zuckerman et al., 1981). These cues are closely related to leakage  
366 too. The findings of Bradley et al. (2008) indicated that the pupil's changes were  
367 larger when viewing emotionally arousing pictures which also were associated  
368 with increased sympathetic activity. Pitch of speech will be different between  
369 honest and deceptive interaction (Ekman et al., 1976; Zuckerman et al., 1981).  
370 Future studies should address all these leaked clues or the "hot spots" of the  
371 deception.

372

## 373 **4. Materials and methods**

### 374 4.1 The database collected by the authors

375 We used the video clips of the same individual who told both lies and truth in  
376 a high-stake game show. The database consisted of 32 video clips (16 persons),  
377 each individual told lies in one video clip and truth in the other.

378 Levine (2018) noted that cues could differ from person to person, and what  
379 spotted one liar was usually different from the signals that revealed the next liar  
380 (Levine, 2019). Meanwhile, cues may vary from sender to sender and message to  
381 message. For the same individual, however, he or she would display the almost  
382 the same pattern on different occasions. Therefore, the relatively ideal  
383 experimental materials should be composed by the same individual who tell both  
384 lies and truth to exclude the variation coming from individual differences (at least,  
385 the variation coming from the same individual should be much less than that  
386 originating from different individuals).

387 Considering the aforementioned variation between people and contexts, our  
388 database consists of video clips of the game show of “the moment of truth” (see  
389 [https://en.wikipedia.org/wiki/The\\_Moment\\_of\\_Truth\\_\(American\\_game\\_show\)](https://en.wikipedia.org/wiki/The_Moment_of_Truth_(American_game_show))  
390 for details) obtained from the internet, in which the same individual tells both lies  
391 and truth. During the game show, most of the people talk emotionally because of  
392 the high-stakes situations they are in. Their emotional facial expressions are  
393 natural, rather than acting based on instructions. The ground truth was according  
394 to whether an individual was lying or not in the game show specifying by a pre-  
395 show polygraph test. Using a game show can avoid the shortcomings of real-  
396 world materials (e.g., appealing for the return of relatives) which cannot  
397 accurately be controlled over knowing the ground truth; meanwhile, the stakes in  
398 the game show can be high (the highest gain from the show can reach at 500, 000  
399 US dollars, and cues to deception will be more pronounced than when there was  
400 no such monetary incentive, see DePaulo et al., 2003).

401 The video clips consist of the fragments when the individual answering the  
402 questions (from the beginning to the end of answering each question). The  
403 duration of the video clips ranges from 3 seconds to 280 seconds, with an average  
404 duration of 56.6 seconds. Because of the setting of the game show (when the  
405 individual lied the game was over), the video clips in which the individual was  
406 telling a truth were much longer than the video clips in which the individual was  
407 telling lies (105.5 s vs. 7.8 s in average, all truth-telling video fragments were  
408 merged into one video clip which duration was much longer than the lying video

409 clip). There were 8 males and 8 females (Participants had no lies were excluded  
410 in the data set) . The frame rate of all the videos was 30 f/s.

411

412 4.2 Using machine vision to compare the features in video clips while people  
413 lying or telling the truth.

414 Asking people to find out the cues to deception is difficult. Furthermore, naïve  
415 human observers may not be able to perceive the subtle differences of the  
416 emotional facial expressions between telling lies and telling truth. Alternatively,  
417 machine vision may do this job well. We proposed a method aimed to use the  
418 AUs of fear to discern deceptive and honest individuals in high-stakes situations.

419 4.2.1 Presenting the videos to a computer vision system.

420 We used the software of OpenFace (Baltrusaitis et al., 2018) to conduct  
421 computer video analysis. The software could automatically detect the face,  
422 localize the facial landmark, output the coordination of the landmarks, and  
423 recognize the facial AUs. OpenFace can identify 18 AUs, (AU01, AU02, AU04,  
424 AU05, AU06, AU07, AU09, AU10, AU12, AU14, AU15, AU17, AU20, AU23,  
425 AU25, AU26, AU28, AU45). Furthermore, the frame-by-frame OpenFace output  
426 can give information on the intensity AUs (i.e., it can provide information on the  
427 presence and intensity of the AUs). Su and Levine (2016) showed that some AUs  
428 of emotional facial expressions can distinguish liars from truth-tellers in high-  
429 stakes situations.

430 According to Frank and Ekman (1997), telling a consequential lie results in  
431 emotions such as fear and guilt. Therefore, we focused on the AUs of fear, i.e.,  
432 AU1, AU2, AU4, AU5, AU20, AU26.

433 4.2.2 using MATLAB to calculate the indicators

434 The videos were put into OpenFace. A set of descriptors was extracted from  
435 OpenFace output frame by frame. The values of AUs of fear were generated by  
436 multiplying the output values of presence (0, 1) and the value of the intensity  
437 (from 0 to 1) for each frame; then the values of AUs of fear in each frame were  
438 aggregated and averaged (the sum of the values of AUs of fear divided by the  
439 number of frames) for further statistical analysis.

440 Next, we used MATLAB code to count the duration of AUs of fear (counting  
441 the number of frames when the value of the presence of corresponding AU was  
442 equal to 1). Because the frame rates of all the videos were the same, the duration  
443 of AU could be represented by the number of frames (the precise duration was  
444 obtained by dividing the total number of frames by frame rate, i.e. 30).

445 Beh and Goh (2019) proposed a method to detect the changes in the Euclidean  
446 distances of facial landmarks to find out microexpressions. We used the distances  
447 of ld1 and rd1, which are distances between facial landmarks at the left/right  
448 eyebrow and left/right eye (index 20/25 and index 40/43, see Figure 3), to  
449 investigate the synchronization and symmetry between left and right facial  
450 movements. The MATLAB function of Wcohenrence (wavelet coherence, the  
451 values ranged from 0 to 1) was used for this purpose, as this function returns the  
452 magnitude-squared wavelet coherence, which is a measure of the correlation  
453 between two signals (herein ld1 and rd1) in the time-frequency domain. If the left  
454 and right facial movements have perfect synchronization and symmetry, the value  
455 of wavelet coherence would be 1.

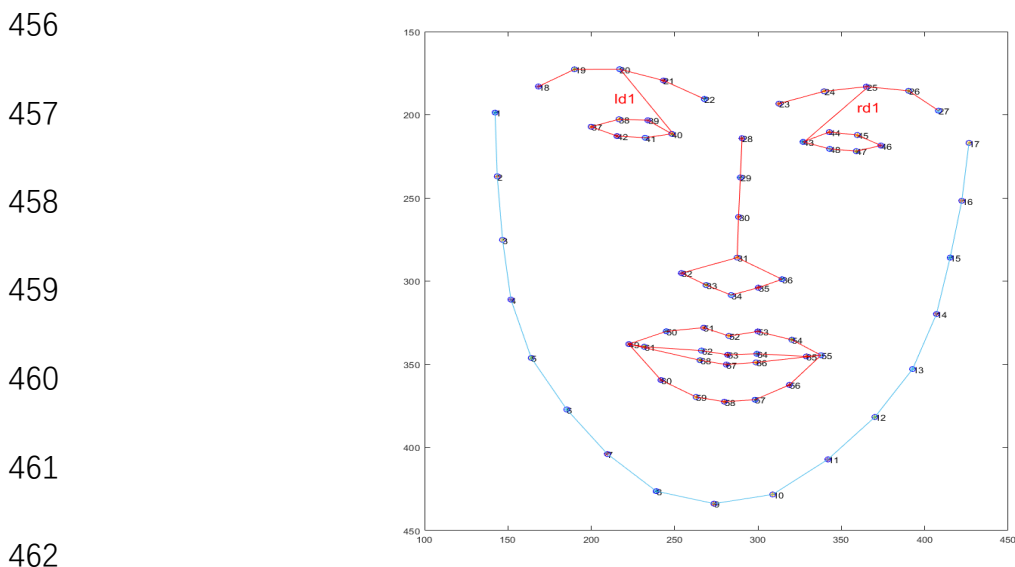

463 Figure 3. The 68 facial landmarks and the Euclidean distances of ld1 and rd1.

464 4.2.3 using Machine Learning to classify the truth or deception.

465 We then used WEKA(Hall et al., 2009), a Machine Learning software, to  
466 classify the videos into groups of truth and deception. Three different classifiers



467 were trained via a 10-fold cross-validation procedure. We selected three  
468 classifiers: Random Forest, K-nearest neighbours, and Bagging. Random forest  
469 operates by constructing a multitude of decision trees which is also a better choice  
470 for data imbalance (Bruer et al., 2020). K-nearest neighbours (lazy.LBK in  
471 WEKA) achieves classification by identifying the nearest neighbours to a query  
472 example and using those neighbours to determine the class of the query  
473 (Cunningham & Delany, 2004). Bagging is a method for generating multiple  
474 versions of a predictor and using these to get an aggregated predictor (Breiman,  
475 1996). Considering the data imbalance (the video clips of truth were much longer  
476 than the video clips of deception, 50097 frames vs. 3689 frames, which is  
477 consistent with real life that lying is not as frequent compared to truth-telling.),  
478 the data were resampled by using SMOTE (Chawla et al., 2002) .

479 The steps of classifying the truth or deception in the video clips are  
480 demonstrated in Figure 4. First, OpenFace detected the face, localized the  
481 landmarks, output the presence and intensity of AUs. Following that, AUs of fear,  
482 as well as indicators used by Beh and Goh (2019) in each frame from both lying  
483 and truth video clips were merged into a facial movement description vector.  
484 Finally, in the classification stage, classifiers of Random Forest, K-nearest  
485 neighbours, and Bagging were trained to discriminate deception and honesty.

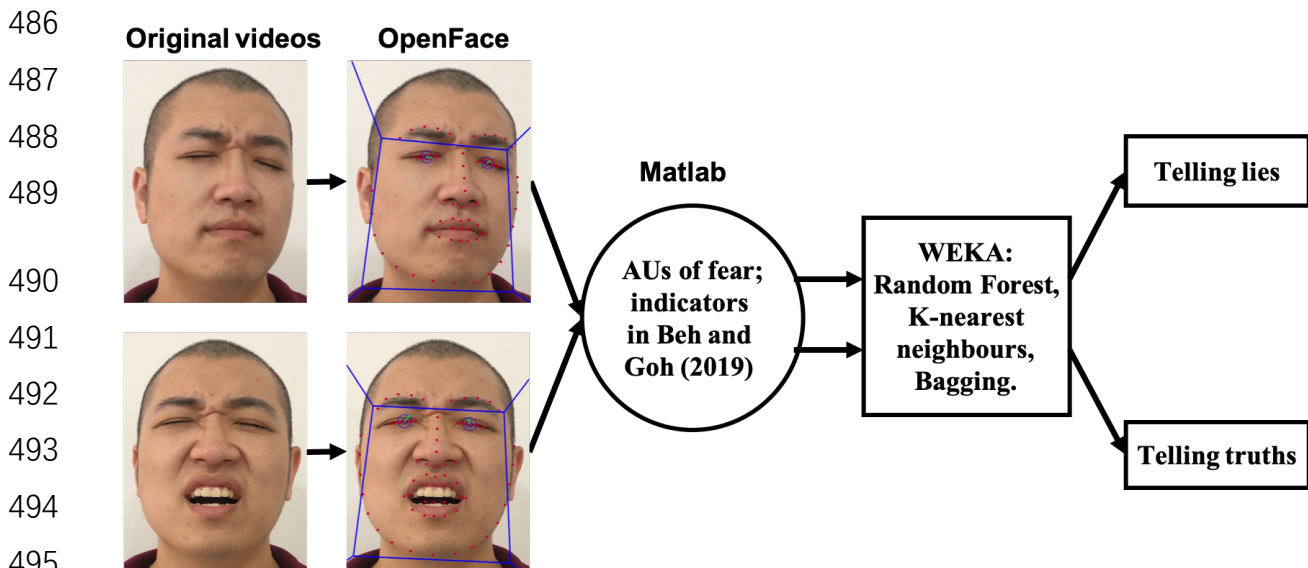

496 Figure 4. Overview of the procedure of classifying video clips. The model used here for  
497 demonstrating the processing flowchart is the third author.

498 **Acknowledgments**

499 This study was partially supported by the grants from the National Natural  
500 Science Foundation of China (No. 31960180, 32000736, 31460251), the Planned  
501 Project of Social Sciences in Jiangxi Province (No. 18JY24), and the project of  
502 "1050 Young top-notch talent" of Jiangxi University of Traditional Chinese  
503 Medicine (No.5141900110, 1141900610).

504

505 **References**

- 506 Baker, A., Black, P. J., & Porter, S. (2016). 10. The Truth Is Written All Over Your Face!  
507 Involuntary Aspects of Emotional Facial Expressions. *The Expression of Emotion:  
508 Philosophical, Psychological and Legal Perspectives*, 219-244.
- 509 Baltrusaitis, T., Zadeh, A., Lim, Y. C., & Morency, L.-P. (2018). Openface 2.0: Facial behavior  
510 analysis toolkit. 2018 13th IEEE International Conference on Automatic Face &  
511 Gesture Recognition (FG 2018),
- 512 Bartlett, M. S., Littlewort, G. C., Frank, M. G., & Lee, K. (2014). Automatic decoding of facial  
513 movements reveals deceptive pain expressions. *Current Biology*, *24*(7), 738-743.
- 514 Beh, K. X., & Goh, K. M. (2019). Micro-Expression Spotting Using Facial Landmarks. 2019  
515 IEEE 15th International Colloquium on Signal Processing & Its Applications (CSPA),
- 516 Bond Jr, C. F., & DePaulo, B. M. (2006). Accuracy of deception judgments. *Personality and  
517 social psychology Review*, *10*(3), 214-234.
- 518 Bradley, M. M., Miccoli, L., Escrig, M. A., & Lang, P. J. (2008). The pupil as a measure of  
519 emotional arousal and autonomic activation. *Psychophysiology*, *45*(4), 602-607.
- 520 Breiman, L. (1996). Bagging predictors. *Machine learning*, *24*(2), 123-140.
- 521 Bruer, K. C., Zanette, S., Ding, X. P., Lyon, T. D., & Lee, K. (2020). Identifying liars through  
522 automatic decoding of children's facial expressions. *Child development*, *91*(4), e995-  
523 e1011.
- 524 Buckley, J. P. (2012). Detection of deception researchers needs to collaborate with experienced  
525 practitioners. *Journal of Applied Research in Memory and Cognition*, *1*(2), 126-127.
- 526 Burgoon, J. K. (2018). Opinion: microexpressions are not the best way to catch a liar. *Frontiers  
527 in Psychology*, *9*, 1672.
- 528 Chawla, N. V., Bowyer, K. W., Hall, L. O., & Kegelmeyer, W. P. (2002). SMOTE: synthetic  
529 minority over-sampling technique. *Journal of artificial intelligence research*, *16*, 321-  
530 357.

- 531 Crampton, J. W. (2019). Platform biometrics. *Surveillance & Society*, 17(1/2), 54-62.
- 532 Cunningham, P., & Delany, S. J. (2004). k-Nearest Neighbour Classifiers. *arXiv preprint*  
533 *arXiv:2004.04523*.
- 534
- 535 Denault, V., Dunbar, N. E., & Plusquellec, P. (2020). The detection of deception during trials:  
536 Ignoring the nonverbal communication of witnesses is not the solution—A response to  
537 Vrij and Turgeon (2018). *The International Journal of Evidence & Proof*, 24(1), 3-11.
- 538 DePaulo, B. M., Lindsay, J. J., Malone, B. E., Muhlenbruck, L., Charlton, K., & Cooper, H.  
539 (2003). Cues to deception. *Psychological Bulletin*, 129(1), 74-118.
- 540 DePaulo, B. M., Lindsay, J. J., Malone, B. E., Muhlenbruck, L., Charlton, K., & Cooper, H.  
541 (2003, Jan). Cues to deception. *Psychol Bull*, 129(1), 74-118.
- 542 Ekman, P. (2003). Darwin, deception, and facial expression. *Annals of the New York Academy*  
543 *of Sciences*, 1000(1), 205-221.
- 544 Ekman, P., & Friesen, W. V. (1969). Nonverbal leakage and clues to deception. *Psychiatry*,  
545 32(1), 88-106.
- 546 Ekman, P., & Friesen, W. V. (1976). Measuring facial movement. *Environmental psychology*  
547 *and nonverbal behavior*, 1(1), 56-75.
- 548 Ekman, P., Friesen, W. V., & Scherer, K. R. (1976). Body movement and voice pitch in  
549 deceptive interaction. *Semiotica*, 16(1), 23-27.
- 550 Ekman, P., Hager, J. C., & Friesen, W. V. (1981). The symmetry of emotional and deliberate  
551 facial actions. *Psychophysiology*, 18(2), 101-106.
- 552 Frank, M. G., & Ekman, P. (1997). The ability to detect deceit generalizes across different  
553 types of high-stake lies. *Journal of personality and social psychology*, 72(6), 1429-  
554 1439.
- 555 Frank, M. G., Ekman, P., & Friesen, W. V. (1993). Behavioral markers and recognizability of  
556 the smile of enjoyment. *Journal of personality and social psychology*, 64(1), 83-93.
- 557 Hall, M., Frank, E., Holmes, G., Pfahringer, B., Reutemann, P., & Witten, I. H. (2009). The  
558 WEKA data mining software: an update. *ACM SIGKDD explorations newsletter*, 11(1),  
559 10-18.
- 560 Hartwig, M., & Bond Jr, C. F. (2014). Lie detection from multiple cues: A meta-analysis.  
561 *Applied Cognitive Psychology*, 28(5), 661-676.
- 562 Hurley, C. M., & Frank, M. G. (2011). Executing facial control during deception situations.  
563 *Journal of Nonverbal Behavior*, 35(2), 119-131.

- 564 Levine, T. R. (2018). Scientific evidence and cue theories in deception research: reconciling  
565 findings from meta-analyses and primary experiments. *International Journal of*  
566 *Communication, 12*, 2461–2479.
- 567 Levine, T. R. (2019). *Duped: Truth-default theory and the social science of lying and deception*.  
568 The University of Alabama Press.
- 569 Matsumoto, D., & Hwang, H. C. (2018). Microexpressions differentiate truths from lies about  
570 future malicious intent. *Frontiers in Psychology, 9*, 2545.
- 571 Matsumoto, D., & Hwang, H. C. (2020). Clusters of nonverbal behavior differentiate truths  
572 and lies about future malicious intent in checkpoint screening interviews. *Psychiatry,*  
573 *Psychology and Law, 1-16*.
- 574 Porter, S., & Ten Brinke, L. (2008). Reading between the lies: Identifying concealed and  
575 falsified emotions in universal facial expressions. *Psychological science, 19(5)*, 508-  
576 514.
- 577 Porter, S., ten Brinke, L., Baker, A., & Wallace, B. (2011). Would I lie to you?“Leakage” in  
578 deceptive facial expressions relates to psychopathy and emotional intelligence.  
579 *Personality and Individual Differences, 51(2)*, 133-137.
- 580 Porter, S., Ten Brinke, L., & Wallace, B. (2012). Secrets and lies: Involuntary leakage in  
581 deceptive facial expressions as a function of emotional intensity. *Journal of Nonverbal*  
582 *Behavior, 36(1)*, 23-37.
- 583 Shen, X., Wu, Q., & Fu, X. (2012). Effects of the duration of expressions on the recognition of  
584 microexpressions. *Journal of Zhejiang University Science B, 13(3)*, 221-230.
- 585 Su, L., & Levine, M. (2016). Does “lie to me” lie to you? An evaluation of facial clues to high-  
586 stakes deception. *Computer Vision and Image Understanding, 147*, 52-68.
- 587 Ten Brinke, L., MacDonald, S., Porter, S., & O'connor, B. (2012). Crocodile tears: Facial,  
588 verbal and body language behaviours associated with genuine and fabricated remorse.  
589 *Law and Human Behavior, 36(1)*, 51-59.
- 590 ten Brinke, L., & Porter, S. (2012). Cry me a river: Identifying the behavioral consequences of  
591 extremely high-stakes interpersonal deception. *Law and Human Behavior, 36(6)*, 469-  
592 477.
- 593 Ten Brinke, L., Porter, S., & Baker, A. (2012). Darwin the detective: Observable facial muscle  
594 contractions reveal emotional high-stakes lies. *Evolution and Human Behavior, 33(4)*,  
595 411-416.

- 596 Van den Assem, M. J., Van Dolder, D., & Thaler, R. H. (2012). Split or steal? Cooperative  
597 behavior when the stakes are large. *Management Science*, *58*(1), 2-20.
- 598 Vrij, A. (2004). 13 Guidelines to catch a liar. In P. A. Granhag & L. A. Strömwall (Eds.),  
599 *The detection of deception in forensic contexts* (pp. 287). Cambridge University Press.
- 600 Vrij, A., Akehurst, L., Soukara, S., & Bull, R. (2006). Detecting deceit via analyses of verbal  
601 and nonverbal behavior in children and adults. *Human communication research*, *30*(1),  
602 8-41.
- 603 Vrij, A., Edward, K., Roberts, K. P., & Bull, R. (2000). Detecting deceit via analysis of verbal  
604 and nonverbal behavior. *Journal of Nonverbal Behavior*, *24*(4), 239-263.
- 605 Vrij, A., & Fisher, R. P. (2020). Unraveling the misconception about deception and nervous  
606 behavior. *Frontiers in Psychology*, *11*, 1377.
- 607 Vrij, A., Hartwig, M., & Granhag, P. A. (2019). Reading lies: nonverbal communication and  
608 deception. *Annual review of psychology*, *70*, 295-317.
- 609 Vrij, A., & Mann, S. (2001). Who killed my relative? Police officers' ability to detect real-life  
610 high-stake lies. *Psychology, Crime & Law*, *7*(2), 119-132.
- 611 Witten, I. H., Frank, E., Hall, M. A., & Pal, C. J. (2016). *Data mining: practical machine*  
612 *learning tools and techniques* (4 ed.). Morgan Kaufmann.
- 613 Wright Whelan, C., Wagstaff, G., & Wheatcroft, J. M. (2015). High stakes lies: Police and  
614 non-police accuracy in detecting deception. *Psychology, Crime & Law*, *21*(2), 127-138.
- 615 Wright Whelan, C., Wagstaff, G. F., & Wheatcroft, J. M. (2014). High-stakes lies: Verbal and  
616 nonverbal cues to deception in public appeals for help with missing or murdered  
617 relatives. *Psychiatry, Psychology and Law*, *21*(4), 523-537.
- 618 Zuckerman, M., DePaulo, B. M., & Rosenthal, R. (1981). Verbal and nonverbal  
619 communication of deception. In S. M. Miller & B. Leonard (Eds.), *Advances in*  
620 *experimental social psychology* (Vol. 14, pp. 1-59). Academic Press.
- 621
- 622
- 623
- 624
- 625
- 626
- 627
- 628

629 Figures

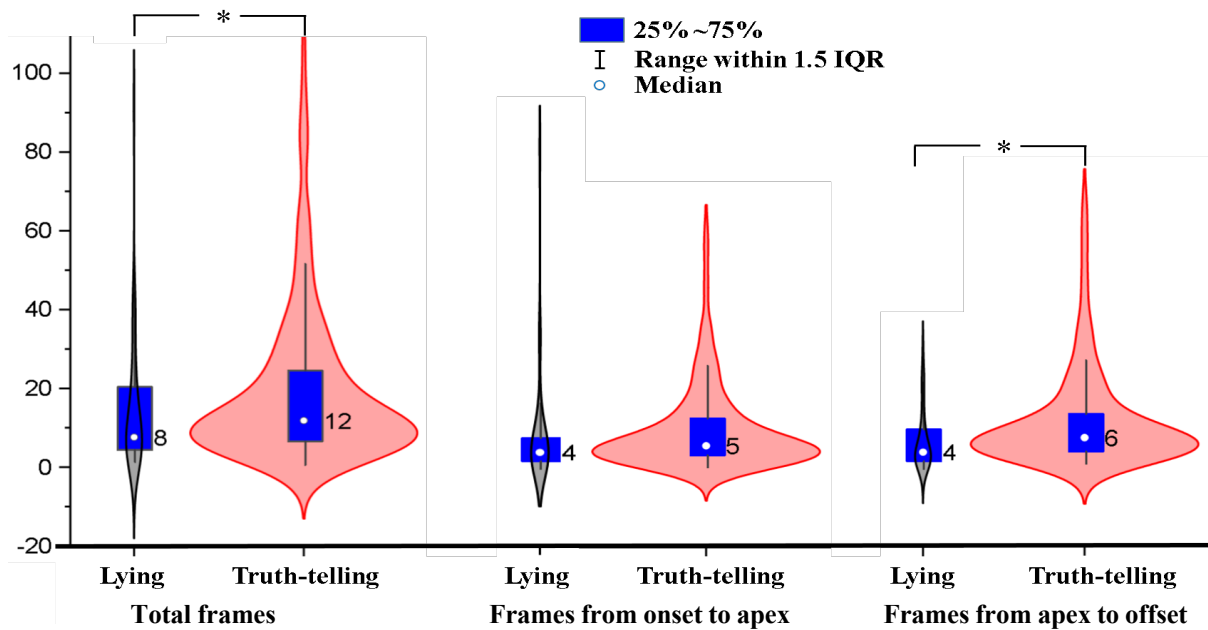

630

631

632

633

634

635

636

637

638

639

640

Figure 1. Violin plot for frames of AU20 in truth-telling and lying video clips. IQR = Inter-Quartile Range. \*: statistically significant ( $p < .05$ ) differences between lying and truth-telling.

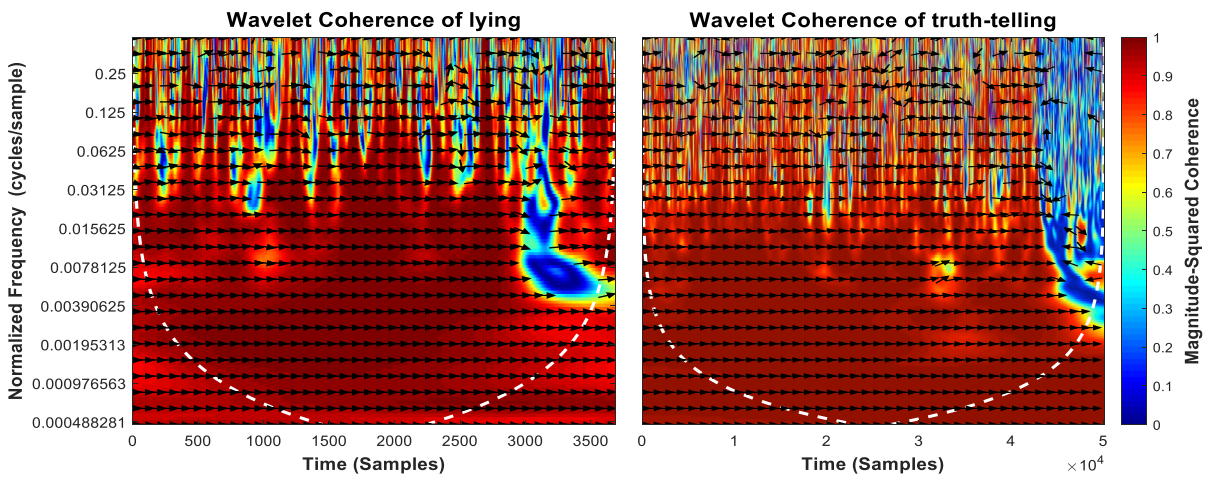

641

642

643

644

645

Figure 2. Squared wavelet coherence between the ld1 and rd1 in lying (left panel) and truth-telling (right panel) situations. The relative phase relationship is shown as arrows (A rightward arrow indicates 0 lag; a bottom-right arrow indicates a small lead of ld1; a leftward arrow indicates ld1 and ld2 is anti-correlated.).

646  
647  
648  
649  
650  
651  
652

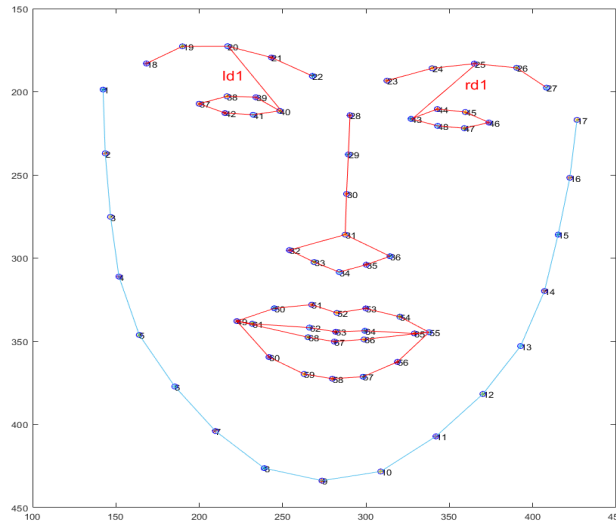

653  
654

Figure 3. The 68 facial landmarks and the Euclidean distances of ld1 and rd1.

655  
656  
657  
658  
659  
660  
661

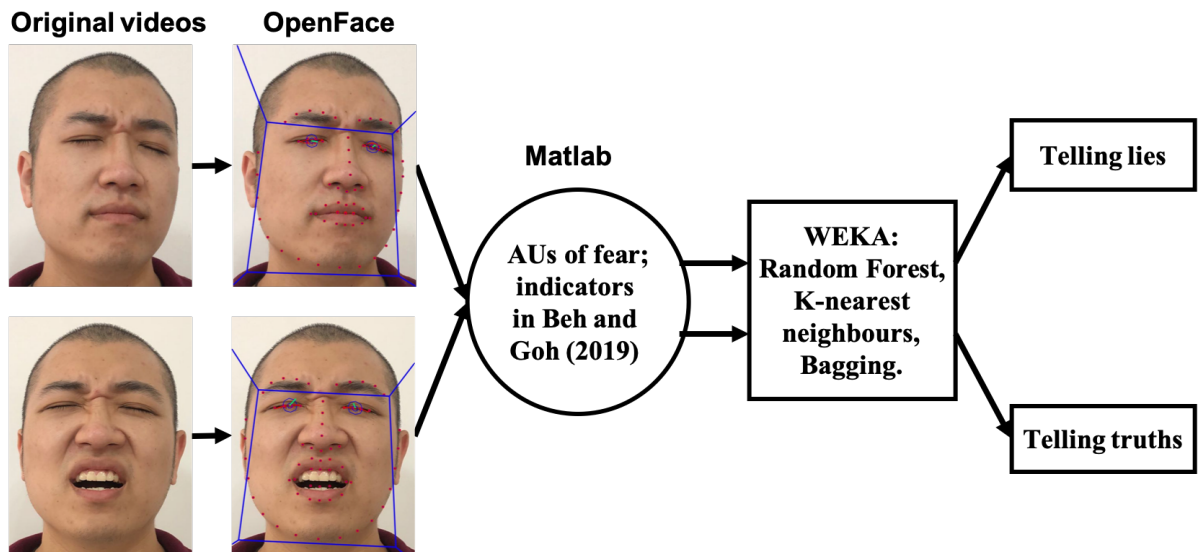

662  
663  
664  
665  
666  
667  
668  
669

Figure 4. Overview of the procedure of classifying video clips. The model used here for demonstrating the processing flowchart is the third author.

670 Tables

671 Table 1. Machine learning performance of the Random Forest, LBK, and Bagging.

| Classifier    | Accuracy | TP Rate | FP Rate | Precision | Recall | F-Measure | PRC Area | Kappa  |
|---------------|----------|---------|---------|-----------|--------|-----------|----------|--------|
| Random Forest | 86.9033% | 0.869   | 0.813   | 0.818     | 0.869  | 0.833     | 0.811    | 0.0829 |
| LBK           | 85.1068% | 0.851   | 0.804   | 0.805     | 0.851  | 0.824     | 0.799    | 0.0624 |
| Bagging       | 86.1482% | 0.861   | 0.852   | 0.794     | 0.861  | 0.821     | 0.827    | 0.0141 |

672

673

674 Table 2. the results of paired *t*-test for comparing the means of values of AUs of fear between  
675 truth-telling and lying video clips

| Feature | Deception (Mean) | Truth (Mean) | 95% CI of mean difference |        | <i>t</i> -value | <i>p</i> -value | Effect size* |
|---------|------------------|--------------|---------------------------|--------|-----------------|-----------------|--------------|
| AU01    | .2544            | .2735        | -.1562                    | .1180  | -.297           | .771            | .074         |
| AU02    | .1308            | .1759        | -.1099                    | .0196  | -1.487          | .158            | .371         |
| AU04    | .1686            | .1554        | -.0709                    | .0972  | .333            | .743            | .084         |
| AU05    | .0341            | .0639        | -.0505                    | -.0090 | -3.060          | .008            | .766         |
| AU07    | .7929            | .8517        | -.3581                    | .2405  | -.419           | .681            | .105         |
| AU20    | .0838            | .1427        | -.0978                    | -.0200 | -3.226          | <b>.006</b>     | .807         |
| AU26    | .3969            | .4721        | -.1825                    | .0321  | -1.493          | .156            | .374         |

676

677 \*Note: the effect sizes were calculated by using the calculator from the website:  
678 [https://memory.psych.mun.ca/models/stats/effect\\_size.shtml](https://memory.psych.mun.ca/models/stats/effect_size.shtml).

679
